# Supplementary material for: An Oxidative Stress Index‐Based Score for Prognostic Prediction in Colorectal Cancer Patients Undergoing Surgery
Source: Hindawi journal article supplement (doi:10.1155/2021/6693707), 2021-01-01

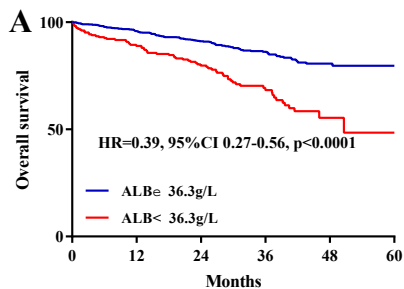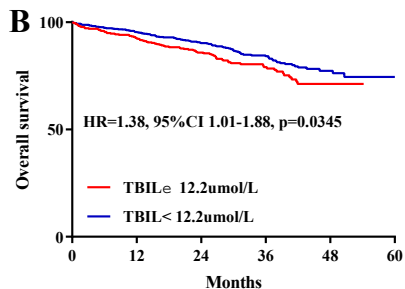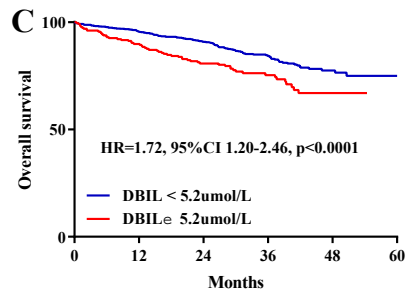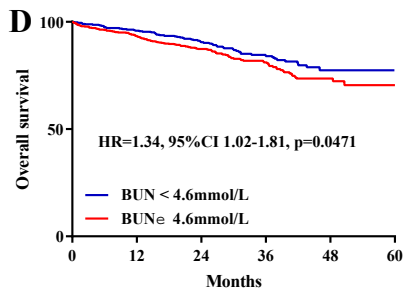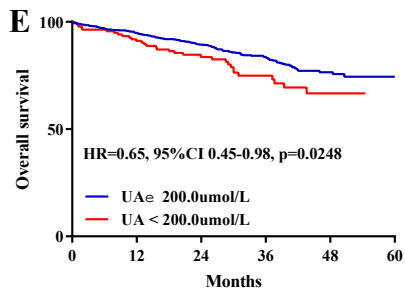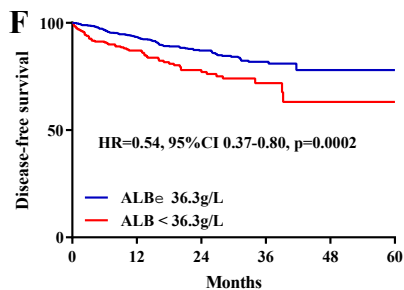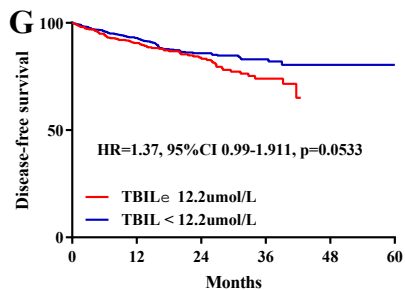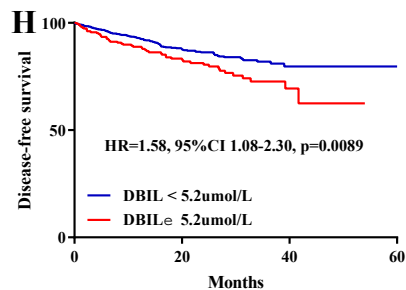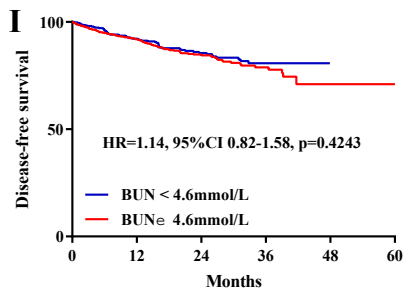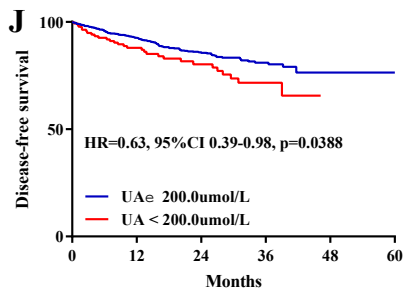

Supplement: f1 [file 6693707.f1.pdf]
